# Supplementary material for: Defining Psychological Factors of Active Transport in Developing Countries
Source: Preprints.org preprint supplement (doi:10.20944/preprints202301.0284.v1), 2023-01-16
Supplement: Supplementary file 1 [file 1%20Certification%20letter%20Native%20English%20Edit%20United%20Kingdom%2000.pdf]

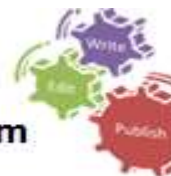

## EDITORIAL CERTIFICATE LETTER

---

This document is to certify that the manuscript listed below was edited for proper English language, grammar, punctuation, spelling, and overall style by one of the highly qualified subject-expert native English speaking editors at **NativeEnglishEdit.com**

The substantive content of the article mentioned below remains the full responsibility of the author/authors:

TITLE OF ARTICLE:

DEFINING PSYCHOLOGICAL FACTORS OF ACTIVE TRANSPORT IN TEHRAN, IRAN.

AUTHOR(S):

MAHDI RASHIDI, SEYED-MOHAMMAD SEYEDHOSSEINI, ALI NADERAN

REFER CODE:

EE-2023-77778987-RASHIDI-5736

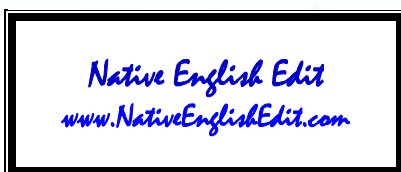

---

Documents receiving this certification should be English-ready for publication; however, the author has the ability to accept or reject our suggestions and changes.

This certificate may be verified at:

[www.NativeEnglishEdit.com](http://www.NativeEnglishEdit.com)

London

East End Road 27, N 3 3QT

United Kingdom
